# Supplementary material for: Fetal demise and failed antibody therapy during Zika virus infection of pregnant macaques
Source: PubMed Central journal article supplement (PMC5915455; doi:10.1038/s41467-018-04056-4), 2018-04-24
Supplement: 41467_2018_4056_MOESM1_ESM.pdf [file 41467_2018_4056_MOESM1_ESM.pdf]

## **Supplementary information**

### **Fetal demise and failed antibody therapy during Zika virus infection of pregnant macaques**

Magnani DM et al.

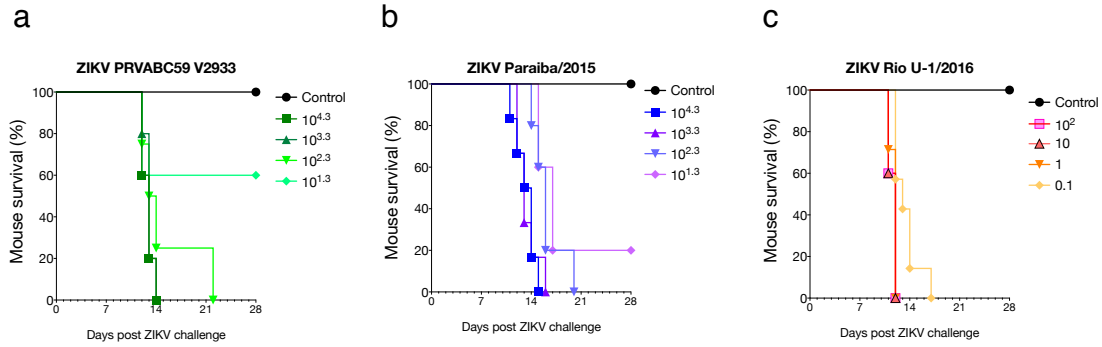

**Supplementary Fig. 1. ZIKV Rio U-1/2016 is pathogenic for AG129 mice.** Kaplan-Meier survival curves after challenge with different doses (PFU) of ZIKV isolates PRVABC59 (a); Paraiba/2015 (b), or Rio U-1/2016 (c). Male and female mice (groups of 5-6 animals) were inoculated with the doses (PFU) of three different ZIKV isolates and survival was followed for 28 days.

**Supplementary Table 1. Study animals**

| <b>Group</b>                    | <b>Animal ID</b> | <b>Gestational day at day of ZIKV inoculation</b> | <b>Age at time of ZIKV inoculation</b> | <b>Weight (kg) at time of ZIKV inoculation</b> | <b>Infant ID (fetal outcome)</b> |
|---------------------------------|------------------|---------------------------------------------------|----------------------------------------|------------------------------------------------|----------------------------------|
| <b>1<sup>st</sup> Trimester</b> | M01              | 44                                                | 14.63                                  | 6.70                                           | F01 (deceased)                   |
|                                 | M02              | 49                                                | 4.76                                   | 4.95                                           | F02 (euthanized)                 |
|                                 | M03              | 49                                                | 3.77                                   | 5.91                                           | F03 (deceased)                   |
| <b>2<sup>nd</sup> Trimester</b> | M04              | 64                                                | 5.92                                   | 3.75                                           | F04 (euthanized)                 |
|                                 | M05              | 100                                               | 9.60                                   | 9.03                                           | F05 (euthanized)                 |
|                                 | M06              | 105                                               | 9.77                                   | 8.08                                           | F06 (alive)                      |
|                                 | M07              | 107                                               | 13.75                                  | 8.11                                           | F07 (alive)                      |
| <b>3<sup>rd</sup> Trimester</b> | M08              | 112                                               | 8.28                                   | 8.41                                           | F08 (euthanized)                 |
|                                 | M09              | 120                                               | 6.31                                   | 8.33                                           | F09 (alive)*                     |
|                                 | M10              | 122                                               | 9.25                                   | 7.19                                           | F10 (alive)*                     |
|                                 | M11              | 124                                               | 9.34                                   | 10.18                                          | F11 (unresponsive)               |
| <b>Therapy experiment</b>       | M12              | 106                                               | 14.06                                  | 6.84                                           | F12 (euthanized)                 |
|                                 | M13              | 125                                               | 8.97                                   | 6.61                                           | F13 (euthanized)                 |
|                                 | M14              | 134                                               | 5.97                                   | 8.90                                           | F14 (euthanized)                 |
|                                 | M15 (untreated)  | 139                                               | 6.82                                   | 9.07                                           | F15 (euthanized)                 |

\*These two animals were born alive and kept alive for 6 months.

**Supplementary Table 2. Summary of ZIKV sequencing**

| Sample ID    | Sample info |       |                |              | Sequencing stats |                                |                       | Variant site (nt, frequency, coverage depth) <sup>b</sup> |                       |                        |                        |                       |                         |                     |                    |                      |
|--------------|-------------|-------|----------------|--------------|------------------|--------------------------------|-----------------------|-----------------------------------------------------------|-----------------------|------------------------|------------------------|-----------------------|-------------------------|---------------------|--------------------|----------------------|
|              | Time (dpi)  | Type  | ZIKV GE/ul RNA | CDS coverage | ZIKV reads       | Ave. cov. depth                | 637                   | 3053                                                      | 4740                  | 5548                   | 5592                   | 6472                  | 6499                    | 7505                | 8888               | 8963                 |
| RIO U-1/2016 | 0           | stock | UD             | 100%         | 1,007,502        | 18,763                         | T                     | T                                                         | G                     | C                      | C                      | C<br>(T 2%,<br>19316) | C                       | C                   | T                  | C                    |
| M12          | 3           | serum | 4,635          | 100%         | 306,288          | 5,327                          | --                    | --                                                        | --                    | --                     | --                     | --                    | --                      | --                  | --                 | --                   |
| M12          | 5           | serum | ~1             | 55.3%        | 441,201          | 3,951                          | --                    | ?                                                         | --                    | ?                      | --                     | ?                     | ?                       | --                  | ?                  | ?                    |
| M12          | 7           | serum | 5              | 91.4%        | 116,939          | 1,779                          | --                    | --                                                        | A (26%,<br>10081)     | --                     | --                     | ?                     | ?                       | --                  | --                 | --                   |
| M12          | 10          | serum | 7              | 82.8%        | 429,089          | 6,945                          | A (35%,<br>18830)     | --                                                        | --                    | --                     | --                     | --                    | ?                       | --                  | --                 | --                   |
| M15          | 3           | serum | 6,582          | 98.2%        | 68,645           | 1,186                          | --                    | --                                                        | --                    | --                     | --                     | T<br>(40%,<br>241)    | --                      | --                  | --                 | --                   |
| M15          | 7           | serum | 13             | 91.9%        | 325,938          | 5,771                          | --                    | --                                                        | --                    | --                     | --                     | ?                     | ?                       | T (41%,<br>27176)   | --                 | --                   |
| M15          | 10          | serum | ~1             | 48.2%        | 331,494          | 4,143                          | ?                     | --                                                        | ?                     | ?                      | --                     | ?                     | ?                       | T<br>(100%,<br>964) | --                 | --                   |
| M01          | 3           | serum | 43             | 93.3%        | 1,263,658        | 21,839                         | --                    | --                                                        | --                    | --                     | --                     | --                    | --                      | --                  | --                 | --                   |
| M01          | 3           | serum | 43             | 97.9%        | 536,471          | 8,997                          | --                    | --                                                        | --                    | --                     | --                     | ?                     | ?                       | --                  | --                 | --                   |
| M05          | 3           | serum | 2              | 83.7%        | 477,124          | 8,350                          | --                    | --                                                        | ?                     | --                     | --                     | ?                     | ?                       | --                  | --                 | ?                    |
| M05          | 20          | AF    | 59             | 89.4%        | 91,413           | 1,563                          | --                    | C (94%,<br>668)                                           | --                    | --                     | --                     | ?                     | ?                       | --                  | --                 | --                   |
| M05          | 41          | AF    | 36             | 83.1%        | 362,283          | 6,377                          | --                    | C<br>(100%,<br>2789)                                      | --                    | A<br>(26%,<br>311)     | T<br>(52%,<br>337)     | ?                     | ?                       | --                  | --                 | T<br>(100%,<br>2300) |
| M09          | 3           | serum | 3,203          | 99.6%        | 713,830          | 10,373                         | --                    | --                                                        | --                    | --                     | --                     | --                    | --                      | --                  | --                 | --                   |
| M09          | 28          | AF    | 3,489          | 99.1%        | 303,059          | 5,234                          | --                    | --                                                        | --                    | --                     | --                     | --                    | --                      | --                  | C<br>(55%,<br>822) | --                   |
| M04          | 3           | serum | 87             | 98.5%        | 934,007          | 13,311                         | --                    | --                                                        | --                    | --                     | --                     | --                    | --                      | --                  | --                 | --                   |
| M04          | 10          | AF    | 2,401          | 98.7%        | 73,412           | 1,276                          | --                    | --                                                        | --                    | --                     | --                     | ?                     | ?                       | --                  | --                 | --                   |
| M07          | 3           | serum | 471            | 97.7%        | 217,375          | 3,869                          | --                    | --                                                        | --                    | --                     | --                     | ?                     | ?                       | --                  | --                 | --                   |
| M11          | 3           | serum | 330            | 97.9%        | 839,985          | 11,333                         | --                    | --                                                        | --                    | --                     | --                     | ?                     | ?                       | --                  | --                 | --                   |
| M06          | 3           | serum | 2,273          | 99.2%        | 383,218          | 6,775                          | --                    | --                                                        | --                    | --                     | --                     | T<br>(40%,<br>1333)   | --                      | --                  | ?                  | --                   |
| M10          | 3           | serum | 625            | 99.4%        | 687,650          | 9,759                          | --                    | --                                                        | --                    | --                     | --                     | --                    | --                      | --                  | --                 | --                   |
| M08          | 3           | serum | 482            | 97.7%        | 742,999          | 10,292                         | --                    | --                                                        | --                    | --                     | --                     | ?                     | ?                       | --                  | --                 | --                   |
| M13          | 3           | serum | 840            | 98.2%        | 290,580          | 5,133                          | --                    | --                                                        | --                    | --                     | --                     | ?                     | ?                       | --                  | --                 | --                   |
| M14          | 3           | serum | 141            | 97.9%        | 391,076          | 6,905                          | --                    | --                                                        | --                    | --                     | --                     | ?                     | ?                       | --                  | --                 | --                   |
| M02          | 3           | serum | 1,734          | 99.1%        | 280,327          | 4,988                          | --                    | --                                                        | --                    | --                     | --                     | ?                     | ?                       | --                  | --                 | --                   |
| M03          | 3           | serum | 136            | 97.9%        | 609,080          | 10,189                         | --                    | --                                                        | --                    | --                     | --                     | ?                     | ?                       | --                  | --                 | --                   |
| Male control | 3           | serum | ~500           | 100%         | 1,373,000        | 23,722                         | --                    | --                                                        | --                    | --                     | --                     | --                    | --                      | --                  | --                 | --                   |
|              |             |       |                |              |                  | <i>Amino acid substitution</i> | prM-M <sub>52</sub> K | silent                                                    | NS3-E <sub>45</sub> K | NS3-A <sub>312</sub> D | NS3-P <sub>327</sub> S | NS4A-A <sub>3</sub> V | NS4A-T <sub>121</sub> I | silent              | silent             | silent               |

<sup>a</sup>Percent coverage of coding sequence (CDS) at a depth of >25 nt

<sup>b</sup>Called intrahost variants must be present at >25% frequency, >100x coverage, on both forward and reverse reads, and not found in other lab stock viruses. Nucleotides sequenced from the stock virus at these sites are >99.9% in favor of the consensus, unless otherwise specified.

--, no change from ZIKV RIO U-1/2016

?, not sufficient coverage (<100x) at this position to confidently call intrahost variants
